# Supplementary material for: The impact of occupational exposures on infection rates during the COVID-19 pandemic: a test-negative design study with register data of 207 034 Dutch workers
Source: PubMed Central journal article supplement (PMC10713988; doi:10.5271/sjweh.4086), 2023-05-01
Supplement: SJWEH-49-259-S001.pdf [file SJWEH-49-259-S001.pdf]

## The impact of occupational exposures on infection rates during the COVID-19 pandemic: a test-negative design study with register data of 207 034 Dutch workers<sup>1</sup>

by Iris Eekhout, PhD,<sup>2</sup> Martie van Tongeren, PhD, Neil Pearce, PhD, Karen M Oude Hengel, PhD

1. *Supplementary material*
2. *Correspondence to: Karen M. Oude Hengel, Netherlands Organisation for Applied Scientific Research TNO, Unit Healthy Living, Sylviusweg 71, 2333 BE Leiden, The Netherlands. [E-mail: karen.oudehengel@tno.nl]*

**Table S1.** JEM scores of the study population for the entire study period and for each pandemic wave<sup>1</sup>

| <b>Transmission risk factors</b> | <b>Total<br/>N(%)</b> | <b>Wave 1<br/>N(%)</b> | <b>Wave 2<br/>N(%)</b> | <b>Wave 3<br/>N(%)</b> |
|----------------------------------|-----------------------|------------------------|------------------------|------------------------|
| Number of contact                |                       |                        |                        |                        |
| - No risk                        | 68198(32.9)           | 48278(32.6)            | 35074(33.1)            | 12030(34.8)            |
| - Low risk                       | 51129(24.7)           | 35647(24.1)            | 25814(24.3)            | 7595(22)               |
| - Elevated risk                  | 43907(21.2)           | 32377(21.9)            | 23099(21.8)            | 7112(20.6)             |
| - High risk                      | 43800(21.2)           | 31667(21.4)            | 22095(20.8)            | 7864(22.7)             |
| Nature of contacts               |                       |                        |                        |                        |
| - No risk                        | 68196(32.9)           | 48276(32.6)            | 35072(33.1)            | 12030(34.8)            |
| - Low risk                       | 50296(24.3)           | 34495(23.3)            | 25032(23.6)            | 7318(21.1)             |
| - Elevated risk                  | 75880(36.7)           | 56022(37.9)            | 40010(37.7)            | 12937(37.4)            |
| - High risk                      | 12662(6.1)            | 9176(6.2)              | 5968(5.6)              | 2316(6.7)              |
| Contaminated workspaces          |                       |                        |                        |                        |
| - No risk                        | 72590(35.1)           | 51624(34.9)            | 37573(35.4)            | 12922(37.3)            |
| - Low risk                       | 52463(25.3)           | 36322(24.5)            | 26406(24.9)            | 7696(22.2)             |
| - Elevated risk                  | 33137(164.0)          | 24979(16.9)            | 17653(16.6)            | 5286(15.3)             |
| - High risk                      | 48844(23.6)           | 35044(23.7)            | 24450(234.0)           | 8697(25.1)             |
| Location                         |                       |                        |                        |                        |
| - No risk                        | 67471(32.6)           | 47767(32.3)            | 34753(32.8)            | 11925(34.5)            |
| - Low risk                       | 8676(4.2)             | 5941(4)                | 4216(4.0)              | 1337(3.9)              |
| - Elevated risk                  | 16058(7.8)            | 11102(7.5)             | 8194(7.7)              | 2286(6.6)              |
| - High risk                      | 114829(55.5)          | 83159(56.2)            | 58919(55.5)            | 19053(55.1)            |
| <b>Mitigation factors</b>        |                       |                        |                        |                        |
| Social distancing                |                       |                        |                        |                        |
| - No risk                        | 69100(33.4)           | 48888(334.0)           | 35537(33.5)            | 12179(35.2)            |
| - Low risk                       | 48559(23.5)           | 34123(23.1)            | 24560(23.2)            | 7442(21.5)             |
| - Elevated risk                  | 66387(32.1)           | 48521(32.8)            | 34546(32.6)            | 10467(30.3)            |
| - High risk                      | 22988(11.1)           | 16437(11.1)            | 11439(10.8)            | 4513(134.0)            |
| Face covering                    |                       |                        |                        |                        |
| - No risk                        | 69313(33.5)           | 49039(33.1)            | 35645(33.6)            | 12220(35.3)            |
| - Low risk                       | 96123(46.4)           | 70302(47.5)            | 49517(46.7)            | 16217(46.9)            |
| - Elevated risk                  | 41598(20.1)           | 28628(19.3)            | 20920(19.7)            | 6164(17.8)             |
| - High risk                      |                       |                        |                        |                        |
| <b>Precarious work</b>           |                       |                        |                        |                        |
| Income insecurity                |                       |                        |                        |                        |
| - No risk                        | 162024(78.3)          | 116188(78.5)           | 83860(79.1)            | 26911(77.8)            |
| - Low risk                       | 22540(10.9)           | 16042(10.8)            | 11444(10.8)            | 3832(11.1)             |
| - Elevated risk                  | 5514(2.7)             | 3878(2.6)              | 2605(2.5)              | 916(2.6)               |
| - High risk                      | 16956(8.2)            | 11861(8)               | 8173(7.7)              | 2942(8.5)              |
| Migrant workers                  |                       |                        |                        |                        |
| - No risk                        | 10158(4.9)            | 7763(5.2)              | 5881(5.5)              | 1645(4.8)              |
| - Low risk                       | 132137(63.8)          | 95092(64.3)            | 68275(64.4)            | 22615(65.4)            |
| - Elevated risk                  | 55794(26.9)           | 38998(26.4)            | 27596(26)              | 9037(26.1)             |
| - High risk                      | 8945(4.3)             | 6116(4.1)              | 4330(4.1)              | 1304(3.8)              |

<sup>1</sup>Wave 1: June 2020 to February 8 2021, Wave 2: February 9 2021 to June 28 2021, Wave 3 June 29 2021 to August 31 2021

**Table S2.** Correlation between JEM scores for the entire study period

|                         | Number of contacts | Nature of contacts | Contaminated workspaces | Location | Social distance | Face covering | Income insecurity | Migrants |
|-------------------------|--------------------|--------------------|-------------------------|----------|-----------------|---------------|-------------------|----------|
| Number of contacts      | 1.00               |                    |                         |          |                 |               |                   |          |
| Nature of contacts      | 0.90               | 1.00               |                         |          |                 |               |                   |          |
| Contaminated workspaces | 0.93               | 0.88               | 1.00                    |          |                 |               |                   |          |
| Location                | 0.82               | 0.88               | 0.78                    | 1.00     |                 |               |                   |          |
| Social distance         | 0.89               | 0.91               | 0.89                    | 0.83     | 1.00            |               |                   |          |
| Face covering           | 0.58               | 0.62               | 0.58                    | 0.78     | 0.69            | 1.00          |                   |          |
| Income insecurity       | 0.37               | 0.27               | 0.41                    | 0.27     | 0.23            | 0.24          | 1.00              |          |
| Migrants                | -0.15              | -0.17              | -0.11                   | -0.05    | -0.14           | 0.15          | 0.24              | 1.00     |





|                                |                           |                           |                           |                           |                           |                           |                           |                           |
|--------------------------------|---------------------------|---------------------------|---------------------------|---------------------------|---------------------------|---------------------------|---------------------------|---------------------------|
| Non-Western                    | <b>1.56 (1.50 - 1.62)</b> | <b>1.53 (1.48 - 1.59)</b> | <b>1.68 (1.60 - 1.77)</b> | <b>1.66 (1.58 - 1.74)</b> | <b>1.46 (1.37 - 1.55)</b> | <b>1.42 (1.33 - 1.52)</b> | <b>1.34 (1.20 - 1.50)</b> | <b>1.33 (1.18 - 1.49)</b> |
| Western                        | 1.00 (0.96 - 1.04)        | 1.00 (0.96 - 1.04)        | 0.98 (0.93 - 1.04)        | 0.99 (0.93 - 1.04)        | 1.01 (0.94 - 1.08)        | 1.00 (0.93 - 1.07)        | 1.09 (0.96 - 1.24)        | 1.08 (0.95 - 1.23)        |
| <b>Household position</b>      |                           |                           |                           |                           |                           |                           |                           |                           |
| Single household               | ref                       | ref                       | ref                       | ref                       | ref                       | ref                       | ref                       | ref                       |
| Single parent                  | 0.98 (0.92 - 1.04)        | 0.98 (0.92 - 1.05)        | 0.98 (0.90 - 1.07)        | 0.98 (0.90 - 1.07)        | 0.95 (0.86 - 1.06)        | 0.96 (0.86 - 1.07)        | 1.15 (0.94 - 1.41)        | 1.17 (0.95 - 1.43)        |
| Part of a couple               | <b>1.16 (1.12 - 1.21)</b> | <b>1.17 (1.12 - 1.22)</b> | <b>1.25 (1.18 - 1.32)</b> | <b>1.25 (1.19 - 1.32)</b> | <b>1.09 (1.02 - 1.17)</b> | <b>1.10 (1.02 - 1.17)</b> | 1.00 (0.89 - 1.13)        | 1.02 (0.90 - 1.15)        |
| Other                          | <b>1.18 (1.11 - 1.25)</b> | <b>1.15 (1.09 - 1.22)</b> | <b>1.20 (1.11 - 1.30)</b> | <b>1.18 (1.09 - 1.28)</b> | 1.05 (0.96 - 1.16)        | 1.03 (0.94 - 1.14)        | 1.18 (0.99 - 1.39)        | 1.12 (0.95 - 1.33)        |
| <b>Children living at home</b> |                           |                           |                           |                           |                           |                           |                           |                           |
| None                           | ref                       | ref                       | ref                       | ref                       | ref                       | ref                       | ref                       | ref                       |
| Children below 12 years        | <b>0.75 (0.73 - 0.78)</b> | <b>0.76 (0.74 - 0.79)</b> | <b>0.77 (0.74 - 0.81)</b> | <b>0.78 (0.74 - 0.81)</b> | <b>0.81 (0.76 - 0.85)</b> | <b>0.81 (0.77 - 0.86)</b> | <b>0.63 (0.56 - 0.71)</b> | <b>0.64 (0.57 - 0.72)</b> |
| Children above 12 years        | <b>1.34 (1.30 - 1.37)</b> | <b>1.34 (1.30 - 1.37)</b> | <b>1.34 (1.30 - 1.39)</b> | <b>1.34 (1.30 - 1.39)</b> | <b>1.40 (1.34 - 1.47)</b> | <b>1.40 (1.34 - 1.47)</b> | <b>1.19 (1.07 - 1.32)</b> | <b>1.19 (1.07 - 1.32)</b> |
| Children in both age groups    | <b>1.23 (1.18 - 1.28)</b> | <b>1.23 (1.18 - 1.28)</b> | <b>1.28 (1.22 - 1.35)</b> | <b>1.28 (1.22 - 1.36)</b> | <b>1.21 (1.13 - 1.30)</b> | <b>1.22 (1.14 - 1.31)</b> | 1.14 (0.98 - 1.32)        | 1.14 (0.98 - 1.32)        |
| <b>Province</b>                |                           |                           |                           |                           |                           |                           |                           |                           |
| Groningen                      | ref                       | ref                       | ref                       | ref                       | ref                       | ref                       | ref                       | ref                       |
| Drenthe                        | 1.08 (0.98 - 1.19)        | 1.08 (0.98 - 1.19)        | 1.12 (0.98 - 1.27)        | 1.12 (0.98 - 1.27)        | 1.08 (0.92 - 1.26)        | 1.08 (0.92 - 1.27)        | 0.93 (0.67 - 1.29)        | 0.93 (0.67 - 1.29)        |
| Flevoland                      | <b>1.33 (1.20 - 1.47)</b> | <b>1.34 (1.21 - 1.48)</b> | <b>1.54 (1.35 - 1.76)</b> | <b>1.56 (1.36 - 1.78)</b> | 1.11 (0.93 - 1.32)        | 1.11 (0.93 - 1.32)        | 1.11 (0.8 - 1.54)         | 1.11 (0.80 - 1.55)        |
| Friesland                      | <b>1.24 (1.13 - 1.35)</b> | <b>1.23 (1.13 - 1.35)</b> | <b>1.16 (1.02 - 1.32)</b> | <b>1.16 (1.02 - 1.32)</b> | <b>1.31 (1.13 - 1.52)</b> | <b>1.30 (1.12 - 1.51)</b> | <b>1.39 (1.05 - 1.84)</b> | <b>1.40 (1.06 - 1.86)</b> |
| Gelderland                     | <b>1.37 (1.27 - 1.48)</b> | <b>1.38 (1.28 - 1.48)</b> | <b>1.43 (1.29 - 1.58)</b> | <b>1.43 (1.29 - 1.58)</b> | <b>1.33 (1.17 - 1.51)</b> | <b>1.34 (1.18 - 1.52)</b> | <b>1.31 (1.04 - 1.65)</b> | <b>1.31 (1.04 - 1.64)</b> |
| Limburg                        | <b>1.64 (1.52 - 1.77)</b> | <b>1.63 (1.51 - 1.77)</b> | <b>1.64 (1.47 - 1.82)</b> | <b>1.63 (1.46 - 1.81)</b> | <b>1.70 (1.49 - 1.94)</b> | <b>1.70 (1.49 - 1.94)</b> | <b>1.53 (1.20 - 1.95)</b> | <b>1.52 (1.19 - 1.94)</b> |
| Noord-Brabant                  | <b>1.57 (1.46 - 1.69)</b> | <b>1.57 (1.46 - 1.69)</b> | <b>1.62 (1.46 - 1.79)</b> | <b>1.62 (1.47 - 1.79)</b> | <b>1.55 (1.37 - 1.75)</b> | <b>1.54 (1.36 - 1.75)</b> | <b>1.47 (1.18 - 1.83)</b> | <b>1.47 (1.18 - 1.84)</b> |
| Noord-Holland                  | <b>1.58 (1.46 - 1.70)</b> | <b>1.58 (1.47 - 1.70)</b> | <b>1.56 (1.41 - 1.73)</b> | <b>1.57 (1.42 - 1.74)</b> | <b>1.59 (1.40 - 1.80)</b> | <b>1.59 (1.40 - 1.80)</b> | <b>1.72 (1.38 - 2.15)</b> | <b>1.72 (1.38 - 2.15)</b> |
| Overijssel                     | <b>1.38 (1.27 - 1.49)</b> | <b>1.38 (1.27 - 1.49)</b> | <b>1.54 (1.38 - 1.72)</b> | <b>1.55 (1.39 - 1.72)</b> | <b>1.18 (1.02 - 1.35)</b> | <b>1.17 (1.02 - 1.35)</b> | <b>1.30 (1.02 - 1.67)</b> | <b>1.31 (1.02 - 1.67)</b> |
| Utrecht                        | <b>1.28 (1.19 - 1.39)</b> | <b>1.29 (1.20 - 1.40)</b> | <b>1.39 (1.25 - 1.55)</b> | <b>1.40 (1.26 - 1.56)</b> | <b>1.16 (1.01 - 1.33)</b> | <b>1.16 (1.02 - 1.33)</b> | 1.23 (0.97 - 1.56)        | 1.24 (0.97 - 1.57)        |
| Zeeland                        | <b>1.33 (1.20 - 1.47)</b> | <b>1.32 (1.20 - 1.46)</b> | <b>1.16 (1.01 - 1.34)</b> | <b>1.16 (1.01 - 1.34)</b> | <b>1.55 (1.32 - 1.82)</b> | <b>1.55 (1.32 - 1.82)</b> | 1.39 (1.01 - 1.91)        | <b>1.39 (1.01 - 1.92)</b> |
| Zuid-Holland                   | <b>1.72 (1.60 - 1.86)</b> | <b>1.73 (1.61 - 1.86)</b> | <b>1.75 (1.58 - 1.93)</b> | <b>1.76 (1.59 - 1.94)</b> | <b>1.74 (1.54 - 1.97)</b> | <b>1.74 (1.54 - 1.97)</b> | <b>1.63 (1.31 - 2.03)</b> | <b>1.65 (1.32 - 2.05)</b> |
| <b>Urbanity</b>                |                           |                           |                           |                           |                           |                           |                           |                           |
| Non-urban                      | ref                       | ref                       | ref                       | ref                       | ref                       | ref                       | ref                       | ref                       |
| Mildly                         | 0.96 (0.92 - 1.00)        | 0.96 (0.92 - 1.00)        | 0.98 (0.92 - 1.03)        | 0.98 (0.92 - 1.03)        | 0.94 (0.87 - 1.00)        | 0.94 (0.87 - 1.01)        | 0.99 (0.85 - 1.16)        | 1.00 (0.85 - 1.17)        |
| Moderate                       | <b>0.94 (0.90 - 0.99)</b> | <b>0.95 (0.90 - 0.99)</b> | 0.96 (0.90 - 1.02)        | 0.96 (0.91 - 1.03)        | <b>0.91 (0.85 - 0.98)</b> | <b>0.92 (0.85 - 0.99)</b> | 0.96 (0.81 - 1.14)        | 0.96 (0.81 - 1.13)        |
| High                           | <b>0.90 (0.86 - 0.94)</b> | <b>0.90 (0.86 - 0.94)</b> | <b>0.90 (0.84 - 0.95)</b> | <b>0.90 (0.85 - 0.96)</b> | <b>0.88 (0.82 - 0.94)</b> | <b>0.89 (0.83 - 0.95)</b> | 0.99 (0.85 - 1.16)        | 0.98 (0.84 - 1.15)        |
| Very High                      | <b>0.84 (0.80 - 0.88)</b> | <b>0.84 (0.80 - 0.88)</b> | <b>0.86 (0.81 - 0.92)</b> | <b>0.87 (0.81 - 0.93)</b> | <b>0.74 (0.69 - 0.81)</b> | <b>0.75 (0.70 - 0.82)</b> | 1.01 (0.85 - 1.19)        | 1.00 (0.84 - 1.18)        |

<sup>1</sup> Partially adjusted analyses are corrected for a previous positive test, all personal characteristics and residence area.; <sup>2</sup> Fully analyses are corrected for a previous positive test, all personal characteristics, residence area and occupational exposure.<sup>2</sup> Wave 1: June 2020 to February 8 2021, Wave 2: February 9 2021 to June 28 2021, Wave 3 June 29 2021 to August 31 2021. \* Due to collinearity, number of contacts was not included in the fully adjusted models; Bold indicates statistical significant (P<0.05).
